# Supplementary material for: Essential Oils Modulate Gene Expression and Ochratoxin A Production in Aspergillus carbonarius
Source: MDPI journal article supplement (doi:10.3390/toxins8080242), 2016-08-19
Supplement: s1 [file s1]

# Supplementary Materials: Essential Oils Modulate Gene Expression and Ochratoxin A Production in *Aspergillus carbonarius*

Rachelle El Khoury, Ali Atoui, Carol Verheecke, Richard Maroun, Andre El Khoury and Florence Mathieu

## 1. Choice of a Suitable Reference Gene for the Gene Expression Study

In order to appropriately choose a reference gene for this study,  $\beta$ -tubulin, calmodulin, cytochrome *c* oxidase subunit V (*cox5*), 18S, actin (*actin1*) and glyceraldehydes 3-phosphate dehydrogenase (*gdpA*) genes were tested using the GeNorm software (version 3.0, 2014, Biogazelle, Ghent, Belgium). Results showed that  $\beta$ -tubulin (geNorm  $M = 0.2$ ) and the actin (geNorm  $M = 0.24$ ) genes displayed a higher stability regardless the cultures conditions, and can be successfully used in our study as reference genes (Figure S1). For this reason,  $\beta$ -tubulin was selected as the reference gene.

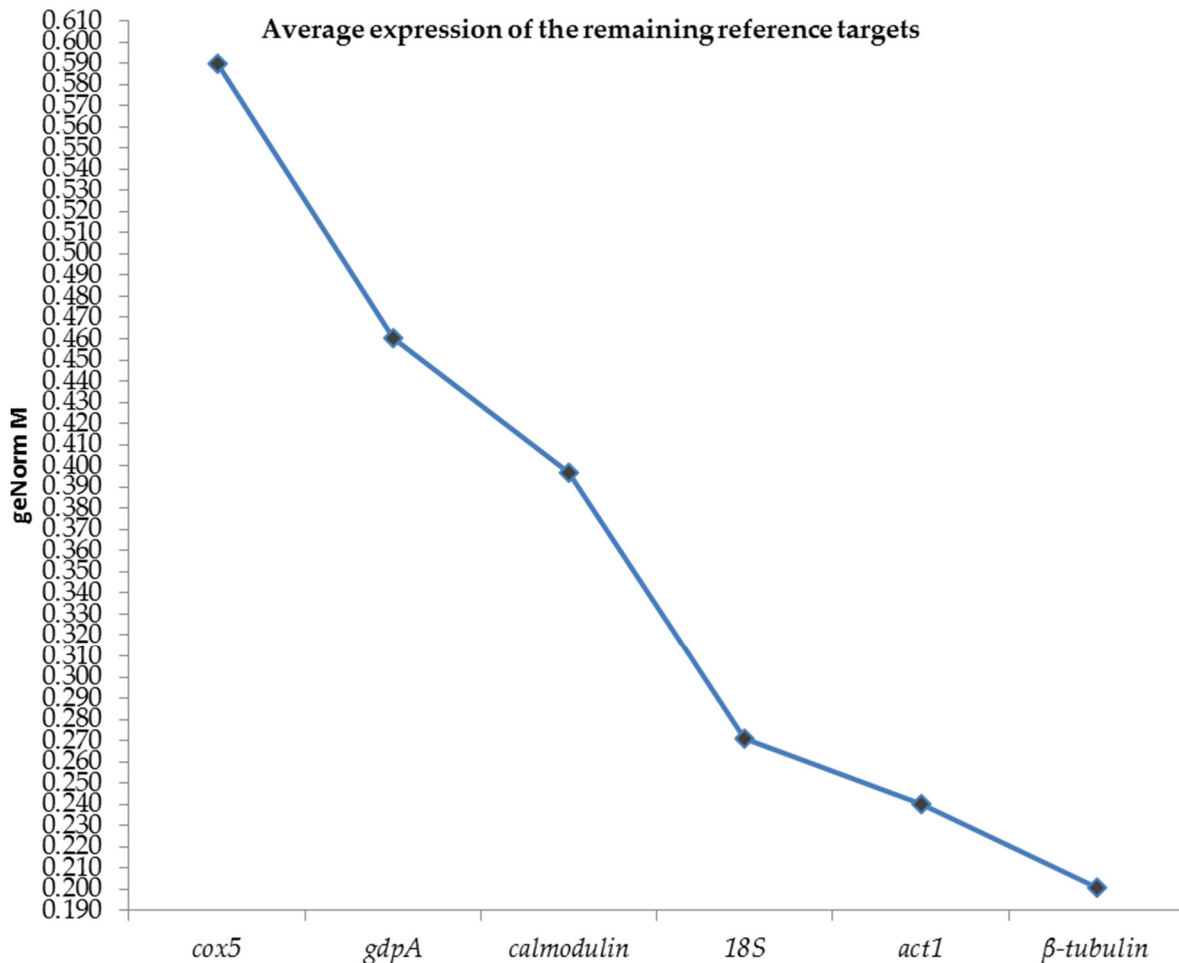

**Figure S1.** Genorm  $M$  value of the six candidate reference genes:  $\beta$ -tubulin, calmodulin, cytochrome *c* oxidase subunit V (*cox5*), 18S, actin (*actin1*) and glyceraldehydes 3-phosphate dehydrogenase (*gdpA*). The most stable gene is the one with the lowest  $M$  value.
